# Supplementary material
Source: Springer Nature journal article supplement (https://www.springermedizin.de/resource/supplementary/12960_2014_464_MOESM1_ESM.pdf/9570150)

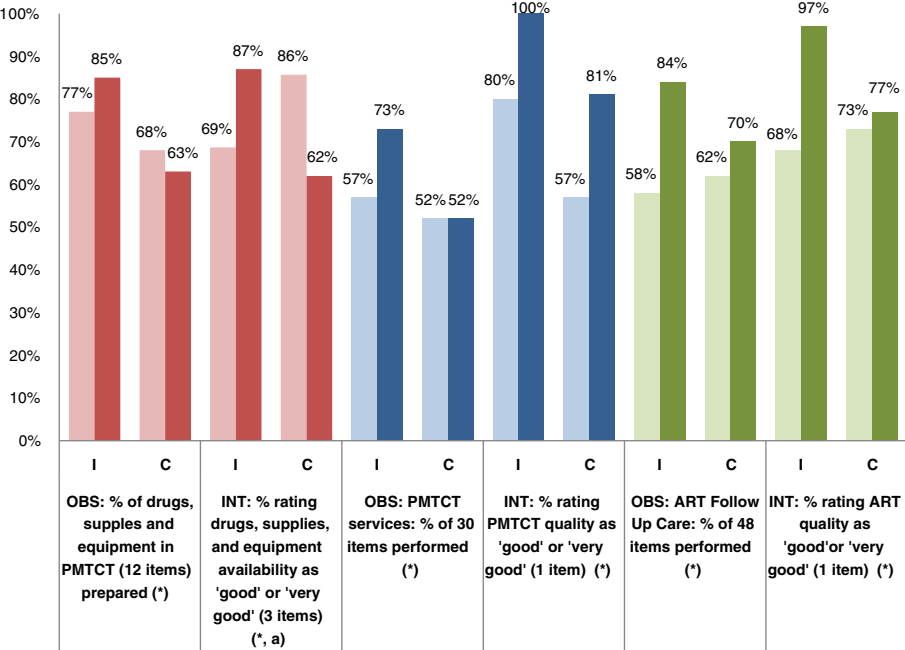

Supplement: MOESM1 [file 9570150]
